# Supplementary material for: Sedanolide Activates KEAP1–NRF2 Pathway and Ameliorates Hydrogen Peroxide-Induced Apoptotic Cell Death
Source: MDPI journal article supplement (doi:10.3390/ijms242216532), 2023-11-20
Supplement: s1 [file s1]

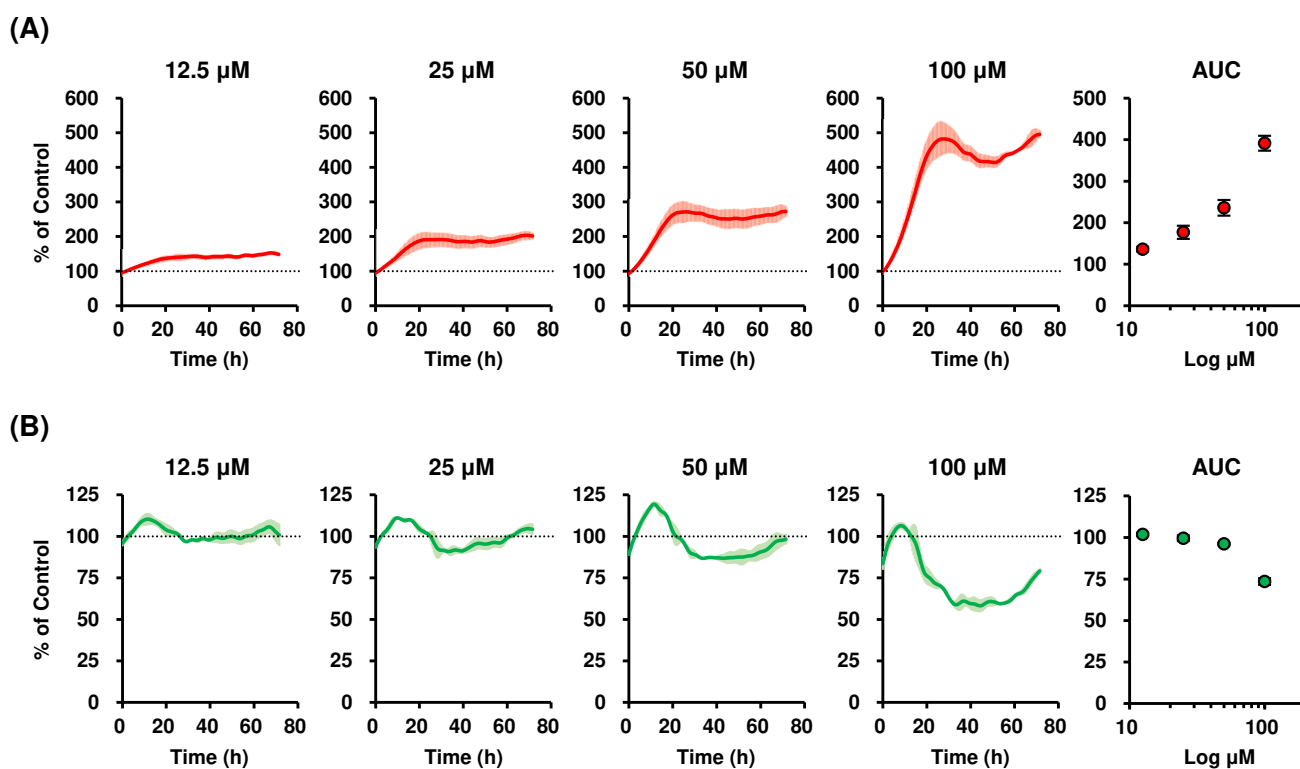

**Supplementary Figure S1.** Real-time bioluminescence recording of sedanolide-treated luciferases-expressing HepG2 cells. Red and green plots represent ARE-TK-driven and TK-driven light outputs of (A) SLR3 and (B) ELuc, respectively. The cells were seeded in a 96-well white clear-bottom plate and treated with sedanolide at various concentrations. Bioluminescence was recorded in real time for 5 s at 30-min intervals for 72 h. Values are means  $\pm$  SD,  $n = 3$ .
